# Supplementary material for: Effective Microorganisms as Halal-Based Sources for Biofertilizer Production and Some Socio-Economic Insights: A Review
Source: MDPI journal article supplement (doi:10.3390/foods12081702), 2023-04-19
Supplement: s1 [file s1]

*Review*

# **The effective microorganisms as halal-based sources for biofertilizer production and some socio-economic insights: A review**

**Chee Kong Yap <sup>1,\*</sup> and Khalid Awadh Al-Mutairi <sup>2</sup>**

<sup>1</sup> Department of Biology, Faculty of Science, Universiti Putra Malaysia, 43400 UPM Serdang, Selangor, Malaysia

<sup>2</sup> Department of Biology, Faculty of Science, University of Tabuk, Tabuk P.O. Box 741, Saudi Arabia; kmutairi@ut.edu.sa

\* Correspondence: yapckong@hotmail.com or yapchee@upm.edu.my

**Table S1.** With the keywords of ‘Halal’ and Food’ must be found the article title using the Scopus database searched on 17 March 2023, a total of 483 papers was recorded. In this number, there was a total of 56 papers was categorized under ‘economics, econometrics and finance’ in the Scopus database.

| N  | Title                                                                                                                                                  | Yea | Perspec- | Country         | Type | Re  |
|----|--------------------------------------------------------------------------------------------------------------------------------------------------------|-----|----------|-----------------|------|-----|
| 1  | Muslims’ purchase intention of halal food: Evidence from Indonesia.                                                                                    | 20  | S-Ec     | Indonesia       | Re-  | [1] |
| 2  | Systematic Literature Review of Halal Ethnic Foods Consumption; Health-Related Scientific; and Marketing Perspective.                                  | 20  | Ec       |                 | Re-  | [2] |
| 3  | Three decades of halal food scholarly publications: A PubMed bibliometric network analysis.                                                            | 20  | Ec       |                 | Re-  | [3] |
| 4  | Enhanced knowledge sharing adoption model in the halal food industry.                                                                                  | 20  | Ec       |                 | Re-  | [4] |
| 5  | Halal Food Certification, Financial Performance, and Sustainability Reporting: Comparative Study of Food and Beverage Firms in Malaysia and Indonesia. | 20  | Ec       | Malaysia/ Indo- | Re-  | [5] |
| 6  | What drives the Halal Food and Beverage Trade? A Gravity Model Investigation.                                                                          | 20  | Ec       |                 | ?    | [6] |
| 7  | Halal Food Prediction Using the Similarity Graph Algorithms.                                                                                           | 20  | Ec       |                 | Re-  | [7] |
| 8  | Analysis of Gen Z Muslims’ Interpersonal Behavior in Halal Food Purchasing in Indonesia.                                                               | 20  | Ec       | Indonesia       | Re-  | [8] |
| 9  | Education for young generations on halal food audit and certification: Challenges and future prospects.                                                | 20  | Ec       |                 | ?    | [9] |
| 10 | IMPLEMENTATION AND IMPACT OF A HALAL FOOD STANDARD: AN EMPIRICAL STUDY OF MALAYSIA.                                                                    | 20  | Ec       | Malaysia        | Re-  | [1] |
| 11 | Impact of Korea’s Image on Attitudes, Norms, and Purchase Intentions of Halal Foods: A Comparison Between Indonesia and Malaysia.                      | 20  | Ec       | Korea           | Re-  | [1] |
| 12 | Muslim Consumers’ Attitude Toward Non-Muslim’s Halal Food Operators: Evidence from Malaysia.                                                           | 20  | Ec       | Malaysia        | Re-  | [1] |
| 13 | Country of Origin, Religiosity and Halal Awareness: A Case Study of Purchase Intention of Korean Food.                                                 | 20  | Ec       | Korea           | Re-  | [1] |
| 14 | The Effect of Halal Awareness on Purchase Intention of Halal Food: A Case Study in Indonesia.                                                          | 20  | Ec       | Indonesia       | Re-  | [1] |
| 15 | Examining the engagement of young consumers for religiously sanctioned food: the case of halal food in India.                                          | 20  | S-Ec     | India           | Re-  | [1] |
| 16 | Determinants of the Intention to Consume Halal Food, Cosmetics and Pharmaceutical Products.                                                            | 20  | Ec       |                 | ?    | [1] |
| 17 | Regulating good agriculture practices (Gaps) in enhancing sustainability of halal food: Malaysian experience.                                          | 20  | Ec       | Malaysia        | Re-  | [1] |
| 18 | Safeguarding halal integrity through halal logistics adoption: A case of food manufacturers.                                                           | 20  | Ec       |                 | Re-  | [1] |
| 19 | The relationship between halal factors and purchase intention of food products as moderated by word-of-mouth communications.                           | 20  | Ec       |                 | Re-  | [1] |
| 20 | Clustering halal food consumers: A Twitter sentiment analysis.                                                                                         | 20  | Ec       |                 | Re-  | [2] |
| 21 | THE ROLE OF HALAL CERTIFICATION ON PURCHASE INTENTION TOWARDS FOOD PRODUCTS FROM MENA COUNTRIES: A SEM STUDY.                                          | 20  | Ec       | MENA?           | ?    | [2] |
| 22 | Commodified religion: The keys to halal food?                                                                                                          | 20  | Ec       |                 | Re-  | [2] |
| 23 | Food certification: The relationships between organic and halal certification in Malaysian food retailing.                                             | 20  | Ec       | Malaysia        | Re-  | [2] |
| 24 | MUSLIM CUSTOMER BEHAVIOR IN HALAL FOOD ONLINE PURCHASING.                                                                                              | 20  | Ec       |                 | Re-  | [2] |
| 25 | Kosher and halal regulations for nutraceutical and functional foods.                                                                                   |     | Ec       |                 | ?    | [2] |
| 26 | Halal Food and Muslim Tourists.                                                                                                                        | 20  | Ec       |                 | ?    | [2] |
| 27 | Does religiosity really matter in purchase intention of Halal certified packaged food products? A survey of Indian muslims consumers.                  | 20  | S-Ec     | Malaysia In-    | Re-  | [2] |

|    |                                                                                                                                                            |    |      |               |     |     |
|----|------------------------------------------------------------------------------------------------------------------------------------------------------------|----|------|---------------|-----|-----|
| 28 | Religious identity, community and religious minorities' search efforts for religiously sanctioned food: The case of halal food in non-Muslim majority mar- | 20 | Ec   |               | Re- | [2] |
| 29 | Halal food consumption as perceived by the non-muslim in Malaysia.                                                                                         | 20 | Ec   | Malaysia      | Re- | [2] |
| 30 | Non-muslim consumers attitude and repurchase behaviour towards halal food: An application of buyer behaviour model.                                        | 20 | Ec   |               | Re- | [3] |
| 31 | Studies on technology and halal food security: A review.                                                                                                   | 20 | S-Ec |               | Re- | [3] |
| 32 | Halal culinary tracking application at food souvenirs center based on analytical hierarchy process (AHP) method. (2017) Pertanika Journal of Social Sci-   | 20 | S-Ec |               | Re- | [3] |
| 33 | Supplier management in halal food supply chain: A preliminary case study.                                                                                  | 20 | S-Ec |               | Re- | [3] |
| 34 | The roles of international entrepreneur orientation and geographical scope level to determine international performance: A case in the Malaysian Halal     | 20 | Ec   | Malaysia      | Re- | [3] |
| 35 | The concept of halal and halal food certification process in Malaysia: Issues and concerns.                                                                | 20 | Ec   | Malaysia      | ?   | [3] |
| 36 | Sustainable food production: Insights of Malaysian halal small and medium sized enterprises.                                                               | 20 | Ec   | Malaysia      | ?   | [3] |
| 37 | Halal food: Keeping pure and true                                                                                                                          | 20 | Ec   |               | ?   | [3] |
| 38 | Influence of the halal certification mark in food product advertisements in Malaysia.                                                                      | 20 | Ec   | Malaysia      | Re- | [3] |
| 39 | Application of halalan tayyiban in the standard reference for determining Malaysian halal food.                                                            | 20 | Ec   | Malaysia      | ?   | [3] |
| 40 | Halal food supply chain knowledge and purchase intention.                                                                                                  | 20 | Ec   |               | ?   | [4] |
| 41 | Case study 4: IKEA Malaysia and the halal food crisis.                                                                                                     | 20 | Ec   | Malaysia      | Re- | [4] |
| 42 | Halal food market and opportunities for logistics sector.                                                                                                  | 20 | S-Ec |               | ?   | [4] |
| 43 | Creating global competitiveness through culture and religion: An insight into the global strategic evolution and marketing of the halal food industry.     | 20 | S-Ec |               | ?   | [4] |
| 44 | Extenuating food integrity risk through supply chain integration: The case of halal food.                                                                  | 20 | S-Ec |               | Re- | [4] |
| 45 | The halal food industry. (2014) Handbook on Islam and Economic Life.                                                                                       | 20 | S-Ec |               | ?   | [4] |
| 46 | Halal development and food exports: Evidence from Malaysia and the Middle Eastern Asian Countries.                                                         | 20 | Ec   | Malaysia mid- | Re- | [4] |
| 47 | Perceptions on Halal food certification in Hat Yai, Thailand.                                                                                              | 20 | Ec   | Thailand      | Re- | [4] |
| 48 | The moderating effect of geographical scope on the relationship between managers' prior international knowledge and working experience and interna-        | 20 | S-Ec | Malaysia      | Re- | [4] |
| 49 | Export barriers to Halal food processing small and medium enterprises (SMEs) in Malaysia.                                                                  | 20 | S-Ec | Malaysia      | Re- | [4] |
| 50 | Business networks in halal food industries in Malaysia.                                                                                                    | 20 | Ec   | Malaysia      | ?   | [5] |
| 51 | Assessment of Consumers' confidence on Halal labelled manufactured food in Malaysia.                                                                       | 20 | S-Ec | Malaysia      | Re- | [5] |
| 52 | Knowledge on halal food amongst food industry entrepreneurs in Malaysia.                                                                                   | 20 | S-Ec | Malaysia      | ?   | [5] |
| 53 | Halal food in New Zealand restaurants: An exploratory study.                                                                                               | 20 | Ec   | NZ            | Re- | [5] |
| 54 | Halal food certification in China. (2019) The Routledge Handbook of Halal Hospitality and Islamic Tourism.                                                 | 20 | Ec   | China         | ?   | [5] |
| 55 | Halal food: Cut-throat competition                                                                                                                         | 20 | Ec   |               | ?   | [5] |
| 56 | The demand for halal food among Muslim travellers in New Zealand.                                                                                          | 20 | Ec   | NZ            | ?   | [5] |

Note: Ec= Economy; S-Ec= Social Economy.

**Table S2.** With the keywords of ‘Halal’ and Food’ must be found the article title using the Scopus database searched on 17 March 2023, a total of 483 papers was recorded. In this number, there was a total of 33 papers was categorized under ‘environmental sciences’ in the Scopus database.

| N | Title                                                                                                                                                                           | Ye |    | Coun  | Type | R   |
|---|---------------------------------------------------------------------------------------------------------------------------------------------------------------------------------|----|----|-------|------|-----|
| 1 | The Embodiment of Muslim Intention Elements in Buying Halal Food Products: A Literature Review.                                                                                 | 20 | S- |       | Re-  | [5] |
| 2 | The Importance of Halal Certification for the Processed Food by SMEs to Increase Export Opportunities.                                                                          | 20 | Ev |       | ?    | [5] |
| 3 | Halal Food Sustainability between Certification and Blockchain: A Review.                                                                                                       | 20 | S- |       | Re-  | [5] |
| 4 | Adoption of analytical technologies for verification of authenticity of halal foods—a review.                                                                                   | 20 | Ev |       | Re-  | [6] |
| 5 | Halal Food Prediction Using the Similarity Graph Algorithms. (2022) International Journal on Food System Dynamics, 13 (2), 165-173.                                             | 20 | S- |       | Re-  | [6] |
| 6 | Identification non-timber forest products as a source of halal food for village communities around the forest. (2021) E3S Web of Conferences, 332, 04001.                       | 20 | Ev |       | Re-  | [6] |
| 7 | Young consumer awareness of halal food in Indonesia. (2021) E3S Web of Conferences, 332, 04004.                                                                                 | 20 | Ev | Indo- | Re-  | [6] |
| 8 | Halal and safety traceability of material, production, and serving of local food in Surabaya: A review. (2021) IOP Conference Series: Earth and Environmental Science, 924 (1), | 20 | Ev | Indo- | Re-  | [6] |
| 9 | Novel primer targeting the mitochondrial NADH dehydrogenase subunit 4 (ND4) and NADH dehydrogenase subunit 5 (ND5) for detection of porcine (Sus scrofa) DNA                    | 20 | Ev |       | Re-  | [6] |
| 1 | A generalization SPARQL federated query: An initial step towards machine-readable web of data for halal food products. (2021). IOP Conference Series: Earth and Environ-        | 20 | Ev |       | Re-  | [6] |
| 1 | Philippine halal food export industry: life cycle, trends, and global outlook. (2021) E3S Web of Conferences, 316, 02044.                                                       | 20 | Ev | Phil- | ?    | [6] |
| 1 | Halal certification impact on firms' corporate social responsibility disclosure: Evidence from the food & beverage sector in Italy.                                             | 20 | S- | Italy | Re-  | [6] |
| 1 | Meat and meat-based products: Challenges and opportunities in halal food security.                                                                                              | 20 | Ev |       | ?    | [6] |
| 1 | The involvement of young entrepreneurs in halal food products in Kelantan.                                                                                                      | 20 | Ev | Ma-   | Re-  | [7] |
| 1 | Comparison halal food regulation and practices to support halal tourism in Asia: A review.                                                                                      | 20 | Ev | Asia  | Re-  | [7] |
| 1 | Integration of Halal Assurance System (HAS) in the Integrated Management System (IMS) to support food industry performance: A review.                                           | 20 | Ev |       | Re-  | [7] |
| 1 | Bill of material analysis framework of food menu to increase raw material inventory efficiency and halal food inspection of culinary business.                                  | 20 | Ev |       | ?    | [7] |
| 1 | An investigation of the aspects affecting non-Muslim customers' purchase intention of halal food products in Jakarta, Indonesia.                                                | 20 | Ev | Indo- | Re-  | [7] |
| 1 | Halal food performance and its influence on patron retention process at tourism destination.                                                                                    | 20 | Ev |       | Re-  | [7] |
| 2 | Characterization of aflatoxin b1 biomarkers as preference for antitoxin candidates for biosensors for halal food supply.                                                        | 20 | S- |       | Re-  | [7] |
| 2 | Determination of Consumer's Willingness to Pay for Halal Food.                                                                                                                  | 20 | Ev |       | Re-  | [7] |
| 2 | Concept of halal food development to support halal tourism: A review.                                                                                                           | 20 | Ev |       | Re-  | [7] |
| 2 | Triplex PCR for halal authentication of processed food: Development and Characterization.                                                                                       | 20 | Ev |       | Re-  | [6] |
| 2 | An analysis of food waste from a flight catering business for sustainable food waste management: A case study of halal food production process.                                 | 20 | Ev |       | Re-  | [8] |
| 2 | Halal food security: Forensic and laboratory management.                                                                                                                        | 20 | Ev |       | ?    | [8] |
| 2 | An analysis of legal protection of halal and thoyib food consumers in court judgments.                                                                                          | 20 | Ev |       | Re-  | [8] |

|   |                                                                                                                        |    |    |       |     |     |
|---|------------------------------------------------------------------------------------------------------------------------|----|----|-------|-----|-----|
| 2 | Design O2O recommendation system for halal food product (HFP) using rule-based user activities.                        | 20 | S- |       | Re- | [8] |
| 2 | Halal food Certification in the UK and its impact on food businesses: A review in the context of the European Union.   | 20 | Ev | EU    | Re- | [8] |
| 2 | Halal compliance decisions by food suppliers based on analytic hierarchy process.                                      | 20 | S- |       | ?   | [8] |
| 3 | Islamic tourism: Beyond than just halal food and a place for prayer.                                                   | 20 | Ev |       | ?   | [8] |
| 3 | Increasing production and eliminating waste through lean tools and techniques for Halal food companies.                | 20 | S- |       | Re- | [8] |
| 3 | Environmental concern in managing halal food supply chain.                                                             | 20 | Ev |       | ?   | [8] |
| 3 | Challenge of the Halal food certificate for food marketing: Implications from the local branding strategy of Thailand. | 20 | S- | Thai- | ?   | [8] |

Note: S-Ev= Social Environment; Ev= Environment.

**Table S3.** With the keywords of ‘Halal’ and Food’ must be found the article title using the Scopus database searched on 17 March 2023, a total of 483 papers was recorded. In this number, there was a total of 82 papers was categorized under ‘social sciences’ in the Scopus database.

| N  | Title of paper                                                                                                                          | Ye | Per- | Country      | Type                         | Re   |
|----|-----------------------------------------------------------------------------------------------------------------------------------------|----|------|--------------|------------------------------|------|
| 1  | Muslims’ purchase intention of halal food: Evidence from Indonesia.                                                                     | 20 | S-Ec | Indonesia    | Research                     | [1]  |
| 2  | Examining the engagement of young consumers for religiously sanctioned food: the case of halal food in India.                           | 20 | S-Ec | India        | Research                     | [15] |
| 3  | Does religiosity really matter in purchase intention of Halal certified packaged food products? A survey of Indian muslims consumers    | 20 | S-Ec | Malaysia In- | Research                     | [27] |
| 4  | Studies on technology and halal food security: A review.                                                                                | 20 | S-Ec |              | Review                       | [31] |
| 5  | Halal culinary tracking application at food souvenirs center based on analytical hierarchy process (AHP) method.                        | 20 | S-Ec |              | Research                     | [32] |
| 6  | Supplier management in halal food supply chain: A preliminary case study.                                                               | 20 | S-Ec |              | Research                     | [33] |
| 7  | Halal food market and opportunities for logistics sector.                                                                               | 20 | S-Ec |              | Research                     | [42] |
| 8  | Creating global competitiveness through culture and religion: An insight into the global strategic evolution and marketing of the halal | 20 | S-Ec |              | Research                     | [43] |
| 9  | Extenuating food integrity risk through supply chain integration: The case of halal food.                                               | 20 | S-Ec |              | Research                     | [44] |
| 10 | The halal food industry. (2014) Handbook on Islam and Economic Life                                                                     | 20 | S-Ec |              | Review                       | [45] |
| 11 | The moderating effect of geographical scope on the relationship between managers' prior international knowledge and working ex-         | 20 | S-Ec | Malaysia     | Research                     | [48] |
| 12 | Export barriers to Halal food processing small and medium enterprises (SMEs) in Malaysia.                                               | 20 | S-Ec | Malaysia     |                              | [49] |
| 13 | Assessment of Consumers' confidence on Halal labelled manufactured food in Malaysia.                                                    | 20 | S-Ec | Malaysia     | Research                     | [51] |
| 14 | Knowledge on halal food amongst food industry entrepreneurs in Malaysia.                                                                | 20 | S-Ec | Malaysia     | Amongst Food Industry Entre- | [52] |
| 15 | The Embodiment of Muslim Intention Elements in Buying Halal Food Products: A Literature Review.                                         | 20 | S-Ev |              | Review                       | [57] |
| 16 | Halal Food Sustainability between Certification and Blockchain: A Review.                                                               | 20 | S-Ev |              | Review                       | [59] |
| 17 | Halal Food Prediction Using the Similarity Graph Algorithms.                                                                            | 20 | S-Ev |              | Research                     | [61] |

|    |                                                                                                                                         |    |      |               |          |      |
|----|-----------------------------------------------------------------------------------------------------------------------------------------|----|------|---------------|----------|------|
| 18 | Halal certification impact on firms' corporate social responsibility disclosure: Evidence from the food & beverage sector in Italy.     | 20 | S-Ev | Italy         | Research | [68] |
| 19 | Characterization of aflatoxin b1 biomarkers as preference for antitoxin candidates for biosensors for halal food supply.                | 20 | S-Ev |               | Research | [76] |
| 20 | Design O2O recommendation system for halal food product (HFP) using rule-based user activities.                                         | 20 | S-Ev |               | Research | [83] |
| 21 | Halal compliance decisions by food suppliers based on analytic hierarchy process.                                                       | 20 | S-Ev |               | Research | [85] |
| 22 | Increasing production and eliminating waste through lean tools and techniques for Halal food companies.                                 | 20 | S-Ev |               | Research | [87] |
| 23 | Challenge of the Halal food certificate for food marketing: Implications from the local branding strategy of Thailand.                  | 20 | S-Ev | Thailand      | Research | [89] |
| 24 | The characteristics of halal and non-halal food territories in multilayered mapping of Jakarta's Chinatown urban foodscape.             | 20 | S    | Indonesia     | Research | [90] |
| 25 | Halal food anxiety in a non-Muslim destination: the impact on the psychological well-being of Muslim travelers during the quarantine    | 20 | S    | China         | Research | [91] |
| 26 | "Food unites us... not anymore!?" Indonesian pilgrims eating kosher and halal in Jerusalem.                                             | 20 | S    | Israel        | ?        | [92] |
| 27 | Urban food environments and cultural adequacy: the (dis)assemblage of urban halal food environments in Muslim minority contexts.        | 20 | S    |               | Research | [93] |
| 28 | Mining halal food search pathways down the Wikipedia's rabbit hole.                                                                     | 20 | S    |               |          | [94] |
| 29 | Effect of alternative preservatives on the quality of rice cakes as halal food.                                                         | 20 | S    |               | Research | [95] |
| 30 | Online Traceability of Halal Food Information to Protect Muslim Consumers in the Cyber Era.                                             | 20 | S    |               | Research | [96] |
| 31 | Exploring social media marketing strategies in small and medium enterprises (SMEs) of the halal food industry.                          | 20 | S    |               | Research | [97] |
| 32 | Desired Muslims: Neoliberalism, halal food production and the assemblage of Muslim expertise, service providers and labour in New       | 20 | S    | Brazil and    | Research | [98] |
| 33 | Stereotyping Halal Food and Eating Halal Food in a South Korean Context.                                                                | 20 | S    | South Korea   | Research | [99] |
| 34 | Theoretical thought of Legal Regulation of Halal Food.                                                                                  | 20 | S    |               |          | [10] |
| 35 | Knowledge of halal Foods by University Students Enrolled in a Dietitian Training Course in Japan.                                       | 20 | S    | Japan         | Research | [10] |
| 36 | Halal for all: Geo spatial tourism of halal food stalls in Muslim minority tourist destinations.                                        | 20 | S    |               | Research | [10] |
| 37 | Spatial and temporal changes in Halal food sales and consumption. A case study of the city of Dearborn, Michigan.                       | 20 | S    | USA           | Research | [10] |
| 38 | Muslim tourists' purchase intention of halal food in Spain.                                                                             | 20 | S    | Spain         | Research | [10] |
| 39 | Blood, body and belonging: the geographies of halal food consumption in the UK.                                                         | 20 | S    | UK            | Research | [10] |
| 40 | Halal food in the tourist destination and its importance for Muslim travellers.                                                         | 20 | S    |               | Research | [10] |
| 41 | Halal food tourism: Perceptions of relevance and viability for South African destinations.                                              | 20 | S    | South African | Research | [10] |
| 42 | Extraction, and characterization of carotenoids from 11 allelopathic plant species as potential halal food colorants and active pharma- | 20 | S    |               | Research | [10] |
| 43 | Global halal food discourse on social media: a text mining approach.                                                                    | 20 | S    |               | Research | [10] |
| 44 | Managing the symbolic power of halal meat in Swedish preschools: Food for thought in discussions on diversity.                          | 20 | S    | Sweden        | Research | [11] |
| 45 | Perception of non-muslim manufacturers towards halal food supply chain in Malaysia.                                                     | 20 | S    | Malaysia      | Research | [11] |
| 46 | The Promotional Language of the Halal Food Industry: Some Preliminary Findings.                                                         | 20 | S    |               | Research | [11] |
| 47 | "Siri is alligator halal?": Mobile apps, food practices, and religious authority among American Muslims.                                | 20 | S    | USA           | Research | [11] |
| 48 | Optimal design for the Halal food logistics network.                                                                                    | 20 | S    |               | Research | [11] |

|    |                                                                                                                                      |    |   |           |          |      |
|----|--------------------------------------------------------------------------------------------------------------------------------------|----|---|-----------|----------|------|
| 49 | Halal food security: Forensic and laboratory management.                                                                             | 20 | S |           | Research | [11] |
| 50 | Evaluation of the business excellent implementation among halal certified food manufacturers in Malaysia.                            | 20 | S | Malaysia  | Research | [11] |
| 51 | Halal food industry in Southeast Asia's Muslim majority countries: A reference for non-Muslim countries.                             | 20 | S | SEA       | Research | [11] |
| 52 | Impact of halal food certification on restaurant business in Indonesia: The mediating role of ethical compliance.                    | 20 | S | Indonesia | Research | [11] |
| 53 | Halal food certification for improving the competitiveness of small and medium enterprises.                                          | 20 | S |           | Research | [11] |
| 54 | Halal virtual inspection requirements for food premise inspection process towards the virtualization of Malaysia Halal certification | 20 | S | Malaysia  | Research | [12] |
| 55 | Sharia As Taboo of Modern Law: Halal Food, Islamophobia, and China.                                                                  | 20 | S | China     | ?        | [12] |
| 56 | Acculturation of halal food to the American food culture through immigration and globalization: A literature review.                 | 20 | S | USA       | Review   | [12] |
| 57 | Managing demand growth for halal food. (2018) Fulfilling The Trust: 50 Years Of Shaping Muslim Religious Life In Singapore.          | 20 | S | Singapore | ?        | [12] |
| 58 | Controversial aspects of religious freedom in Spain and Europe: Halal food and casher.                                               | 20 | S | Spain     | ?        | [12] |
| 59 | Halal chops and fascist cupcakes: On diversity and the weaponisation of food.                                                        | 20 | S |           | ?        | [12] |
| 60 | Halal foods discourse and constructing Muslim identities in Japan.                                                                   | 20 | S | Japan     | ?        | [12] |
| 61 | An adoption of halal food recognition system using mobile Radio Frequency Identification (RFID) and Near Field Communication         | 20 | S |           | Research | [12] |
| 62 | Legal conditions and controls for halal food Experience Indonesia.                                                                   | 20 | S | Indonesia | ?        | [12] |
| 63 | Halal food regulations in Malaysia: Concept and compliance.                                                                          | 20 | S | Malaysia  | ?        | [12] |
| 64 | The usage of social media as an information seeking tool of Halal food products.                                                     | 20 | S |           | ?        | [13] |
| 65 | The Concept of Halal Food in Sharia Perspective and Product Responsibility of Halal Industry.                                        | 20 | S |           | ?        | [13] |
| 66 | An attempt to apply actor-network theory to halal food production and supply in Japan.                                               | 20 | S | Japan     | Research | [13] |
| 67 | The efficiency of halal processed food industry in Malaysia.                                                                         | 20 | S | Malaysia  | ?        | [13] |
| 68 | Muslim food consumption in China: Between qingzhen and halal.                                                                        | 20 | S | China     | ?        | [13] |
| 69 | Who owns halal?: Five international initiatives of halal food regulations.                                                           | 20 | S |           | ?        | [13] |
| 70 | Application of halalan tayyiban in the standard reference for determining Malaysian halal food.                                      | 20 | S | Malaysia  | Research | [13] |
| 71 | Islamic tourism: Beyond than just halal food and a place for prayer.                                                                 | 20 | S |           | ?        | [13] |
| 72 | Customer perceptions on Halal food quality towards their revisit intention: A case study on Chinese Muslim restaurants.              | 20 | S | China     | Research | [13] |
| 73 | Strict Liability Food Law and Halal Slaughter.                                                                                       | 20 | S |           | ?        | [13] |
| 74 | Rye bread and halal: Enregisterment of food practices in the primary classroom.                                                      | 20 | S |           | ?        | [14] |
| 75 | Halal on the menu?: Contested food politics and French identity in fast-food.                                                        | 20 | S |           | ?        | [14] |
| 76 | Halāl food and products in Malaysia: People's awareness and policy implications.                                                     | 20 | S | Malaysia  | Research | [14] |
| 77 | Species Authentication Methods in Foods and Feeds: The Present, Past, and Future of Halal Forensics.                                 | 20 | S |           | Review   | [14] |
| 78 | Globalization: Explaining the dynamics and challenges of the halāl food surge.                                                       | 20 | S |           | ?        | [14] |
| 79 | Halal food and tourism: Prospects and challenges.                                                                                    | 20 | S |           | ?        | [14] |

---

|    |                                                                              |    |   |          |   |      |
|----|------------------------------------------------------------------------------|----|---|----------|---|------|
| 80 | Illegal Labelling and Sales of Halal Meat and Food Products.                 | 20 | S |          | ? | [14] |
| 81 | Production of halal food: Practices of muslim small enterprises in Malaysia. | 20 | S | Malaysia | ? | [14] |
| 82 | Introduction Halal pizza: Food and culture in a busy world.                  | 20 | S |          | ? | [14] |

Note: S= Social; S-Ec= Social economy; S-Ev= Social Environment.



## References

- [1] Febriandika, N.R., Wijaya, V., Hakim, L. Gen-Z. Muslims' purchase intention of halal food: Evidence from Indonesia. (2023) *Innovative Marketing*, 19(1), 3-25.
- [2] Maqsood, R., Ayyub, R.M. Systematic Literature Review of Halal Ethnic Foods Consumption; Health-Related Scientific; and Marketing Perspective. (2023) *Springer Proceedings in Business and Economics*, pp. 203-226.
- [3] Mostafa, M.M. Three decades of halal food scholarly publications: A PubMed bibliometric network analysis. (2022) *International Journal of Consumer Studies*, 46 (4), 058-1075.
- [4] Samsi, S.Z M. Enhanced knowledge sharing adoption model in the halal food industry. (2022) *Understanding, Implementing, and Evaluating Knowledge Management in Business Settings*, pp. 83-105.
- [5] Arieftiara, D., Nawir, J., Julianisa, I.A. Halal Food Certification, Financial Performance, and Sustainability Reporting: Comparative Study of Food and Beverage Firms in Malaysia and Indonesia. (2022) *AgBioForum*, 24 (2), 2-22.
- [6] Hamid, B.A., Charoenchang, C., Dewandaru, G., Islam, M.U. What drives the Halal Food and Beverage Trade? A Gravity Model Investigation. (2022) *Cuadernos de Economia*, 45 (127), 91-201.
- [7] Rakhmawati, N.A., Utomo, G.K., Indraswari, R., Susetyo, I.R. Halal Food Prediction Using the Similarity Graph Algorithms. (2022) *International Journal on Food System Dynamics*, 13 (2), 65-173.
- [8] Bawono, A., Saputra, Y., Annur, F. Analysis of Gen Z Muslims' Interpersonal Behavior in Halal Food Purchasing in Indonesia. (2022) *Journal of King Abdulaziz University, Islamic Economics*, 35 (1), pp. 99-115.
- [9] Hashmi, H.S., Ali, H. Education for young generations on halal food audit and certification: Challenges and future prospects. (2021) *Contemporary Issues in Islamic Social Finance*, pp. 273-292.
- [10] Sari, D.P., Jaswir, I., Bin Haji Che Daud, Md.R. IMPLEMENTATION AND IMPACT OF A HALAL FOOD STANDARD: AN EMPIRICAL STUDY OF MALAYSIA. (2021) *Journal of Islamic Monetary Economics and Finance*, 7 (3), pp. 473-502.
- [11] Yang, J.-J., Kim, D.-H., Lee, H.-Y. Impact of Korea's Image on Attitudes, Norms, and Purchase Intentions of Halal Foods: A Comparison Between Indonesia and Malaysia. (2021) *Journal of Korea Trade*, 25 (5), -18.
- [12] Ariffin, S.K., Mohsin, A.M.A., Salamzadeh, Y. Muslim Consumers' Attitude Toward Non-Muslim's Halal Food Operators: Evidence from Malaysia. (2021) *Eurasian Studies in Business and Economics*, 11 (5), pp. 53-66.
- [13] Astuti, Y., Asih, D. Country of Origin, Religiosity and Halal Awareness: A Case Study of Purchase Intention of Korean Food. (2021) *Journal of Asian Finance, Economics and Business*, 8 (4), pp. 0413-0421.
- [14] Vizano, N.A., Khamaludin, K., Fahlevi, M. The Effect of Halal Awareness on Purchase Intention of Halal Food: A Case Study in Indonesia. (2021) *Journal of Asian Finance, Economics and Business*, 8 (4), pp. 441-453.
- [15] Hassan, Y., Pandey, J. Examining the engagement of young consumers for religiously sanctioned food: the case of halal food in India. (2020) *Young Consumers*, 21 (2), pp. 211-232.
- [16] SUDARSONO, H., NUGROHOWATI, R.N.I. Determinants of the Intention to Consume Halal Food, Cosmetics and Pharmaceutical Products. (2020) *Journal of Asian Finance, Economics and Business*, 7 (10), pp. 831-841.
- [17] Sulaiman, S.S. Regulating good agriculture practices (Gaps) in enhancing sustainability of halal food: Malaysian experience. (2020) *Malaysian Journal of Consumer and Family Economics*, 24 (S2), pp. 32-45.
- [18] Yunan, Y.S.M., Ali, M.H., Alam, S.S. Safeguarding halal integrity through halal logistics adoption: A case of food manufacturers. (2020) *Institutions and Economics*, 12 (3), 8-40.
- [19] Hamzah, M.I., Othman, A.K., Rashid, W.E.W., Ngah, N.M.A. The relationship between halal factors and purchase intention of food products as moderated by word-of-mouth communications. (2020) *International Journal of Business and Society*, 21 (2), pp. 865-882.
- [20] Mostafa, M.M. Clustering halal food consumers: A Twitter sentiment analysis. (2019) *International Journal of Market Research*, 61 (3), pp. 320-337.
- [21] Perdana, F.F.P., Jan, M.T., Altunişik, R., Jaswir, I., Kartika, B. THE ROLE OF HALAL CERTIFICATION ON PURCHASE INTENTION TOWARDS FOOD PRODUCTS FROM MENA COUNTRIES: A SEM STUDY. (2019) *Journal of Islamic Monetary Economics and Finance*, 5 (1), pp. 63-88.
- [22] Parlak, D. Commodified religion: The keys to halal food? (2019) *The Routledge Handbook of Halal Hospitality and Islamic Tourism*, pp. 326-335.
- [23] Ibrahim, M.A., Michael Hall, C., Ballantine, P.W. Food certification: The relationships between organic and halal certification in Malaysian food retailing. (2019) *The Routledge Handbook of Halal Hospitality and Islamic Tourism*, pp. 264-277.
- [24] Al-Banna, H. MUSLIM CUSTOMER BEHAVIOR IN HALAL FOOD ONLINE PURCHASING. (2019) *Journal of Islamic Monetary Economics and Finance*, 5 (3), pp. 517-540.
- [25] Regenstein, J.M. Kosher and halal regulations for nutraceutical and functional foods. (2019) *Nutraceutical and Functional Food Regulations in the United States and around the World*, pp. 589-600.
- [26] Haddad, R., Harahsheh, S., Harb, A. Halal Food and Muslim Tourists. (2019) *The Routledge Handbook of Gastronomic Tourism*, pp. 441-451.
- [27] Khan, A., Azam, M.K., Arafat, M.Y. Does religiosity really matter in purchase intention of Halal certified packaged food products? A survey of Indian muslims consumers. (2019) *Pertanika Journal of Social Sciences and Humanities*, 27 (4), pp. 2383-2400.
- [28] Mumuni, A.G., Veeck, A., Luqmani, M., Quraeshi, Z.A., Kamarulzaman, Y. Religious identity, community and religious minorities' search efforts for religiously sanctioned food: The case of halal food in non-Muslim majority markets. (2018) *International Journal of Consumer Studies*, 42 (6), pp. 586-598.
- [29] Yunos, N., Mohamad, Z., Ghazali, M.A., Awang, M.D. Halal food consumption as perceived by the non-muslim in Malaysia. (2018) *Malaysian Journal of Consumer and Family Economics*, 21, 24-135.
- [30] Damit, D.H.D.A., Harun, A., Martin, D., Shamsudin, A.S.B., Kassim, A.W.M. Non-muslim consumers attitude and repurchase behaviour towards halal food: An application of buyer behaviour model. (2018) *WSEAS Transactions on Business and Economics*, 15, pp. 413-422.
- [31] Jalil, N.S., Norman, A.A., Hamid, S. Studies on technology and halal food security: A review. (2017) *Pertanika Journal of Social Sciences and Humanities*, 25 (December), pp. 225-239.

- [32] Sucipto, S., Effendi, M., Khilmi, M.U., Kamal, M.A., Pinandito, A., Tolle, H. Halal culinary tracking application at food souvenirs center based on analytical hierarchy process (AHP) method. (2017) *Pertanika Journal of Social Sciences and Humanities*, 25 (December), pp. 51-64.
- [33] Fujiwara, T. Supplier management in halal food supply chain: A preliminary case study. (2017) *Pertanika Journal of Social Sciences and Humanities*, 25 (December), pp. 25-38.
- [34] Ismail, N.A. The roles of international entrepreneur orientation and geographical scope level to determine international performance: A case in the Malaysian Halal food industry. (2017) *International Journal of Entrepreneurship*, 21 (1), pp. 33-46.
- [35] Asa, R.S., Azmi, I.M.A.G. The concept of halal and halal food certification process in Malaysia: Issues and concerns (2017) *Malaysian Journal of Consumer and Family Economics*, 20 (S1), pp. 38-50.
- [36] Ali, M.H., Suleiman, N. Sustainable food production: Insights of Malaysian halal small and medium sized enterprises. (2016) *International Journal of Production Economics*, 181, pp. 303-314.
- [37] Halal food: Keeping pure and true (2016) *Economist (United Kingdom)*, 412 (9006).
- [38] Hassan, S.H., Dann, S., Kamal, K.A.M., de Run, E.C. Influence of the halal certification mark in food product advertisements in Malaysia. (2016) *The New Cultures of Food: Marketing Opportunities from Ethnic, Religious and Cultural Diversity*, pp. 243-262.
- [39] Arif, S., Sidek, S. Application of halal tayyiban in the standard reference for determining Malaysian halal food (2015) *Asian Social Science*, 11 (17), 16-129.
- [40] Yusoff, F.A.M., Yusof, R.N.R., Hussin, S.R. Halal food supply chain knowledge and purchase intention. (2015) *International Journal of Economics and Management*, 9 (Special Issue), 55-172.
- [41] Mutum, D.S., Ghazali, E.M. Case study 4: IKEA Malaysia and the halal food crisis. (2014) *Marketing Cases from Emerging Markets*, 9783642368615, pp. 31-33.
- [42] Yener, D. Halal food market and opportunities for logistics sector. (2014) *Emerging Research on Islamic Marketing and Tourism in the Global Economy*, 16-134.
- [43] Camillo, A.A., Marques, J., Holt, S., Hu, J. Creating global competitiveness through culture and religion: An insight into the global strategic evolution and marketing of the halal food industry. (2014) *Handbook of Research on Effective Marketing in Contemporary Globalism*, pp. 335-347.
- [44] Ali, M.H., Tan, K.H., Pawar, K., Makhbul, Z.M. Extenuating food integrity risk through supply chain integration: The case of halal food. (2014) *Industrial Engineering and Management Systems*, 13 (2), 54-162.
- [45] Regenstein, J.M., Riaz, M.N., Chaudry, M., Regenstein, C.E. The halal food industry. (2014) *Handbook on Islam and Economic Life*, 75-194.
- [46] Masron, T.A., Azman, N.H.N., Hassan, S.H. Halal development and food exports: Evidence from Malaysia and the Middle Eastern Asian Countries. (2014) *Jurnal Ekonomi Malaysia*, 48 (2), pp. 61-69.
- [47] Abdul, M. Perceptions on Halal food certification in Hat Yai, Thailand. (2014) *International Journal of Economics and Management*, 8 (1), 78-194.
- [48] Ismail, N.A., Mohamed, Z.A., Uli, J. The moderating effect of geographical scope on the relationship between managers' prior international knowledge and working experience and international performance in the Malaysian Halal Food Industry. (2013) *Pertanika Journal of Social Science and Humanities*, 21 (SPEC. ISSUE), 15-132.
- [49] Ismail, M.M., Islam, M.S., Bakar, W.M.M.W. Export barriers to Halal food processing small and medium enterprises (SMEs) in Malaysia. (2013) *Pertanika Journal of Social Sciences and Humanities*, 21 (August), pp. 31-46.
- [50] Idris, N.A.H. Business networks in halal food industries in Malaysia. (2013) *Jurnal Ekonomi Malaysia*, 47 (1), pp. 87-98.
- [51] Rezai, G., Mohamed, Z., Shamsudin, M.N. Assessment of Consumers' confidence on Halal labelled manufactured food in Malaysia. (2012) *Pertanika Journal of Social Science and Humanities*, 20 (1), pp. 33-42.
- [52] Rahman, A.H.A., Ahmad, W.I.W., Mohamad, M.Y., Ismail, Z. Knowledge on halal food amongst food industry entrepreneurs in Malaysia. (2011) *Asian Social Science*, 7 (12), pp. 216-221.
- [53] Wan-Hassana, W.M., Awangb, K.W. Halal food in New Zealand restaurants: An exploratory study. (2009) *International Journal of Economics and Management*, 3 (2), pp. 385-402.
- [54] Chen, N., Qi, S., Michael Hall, C. Halal food certification in China. (2019) *The Routledge Handbook of Halal Hospitality and Islamic Tourism*, pp. 249-263.
- [55] Halal food: Cut-throat competition (2009) *Economist*, 392 (8649).
- [56] Wan Hassan, M., Hall, C.M. The demand for halal food among Muslim travellers in New Zealand. (2003) *Food Tourism Around The World*, pp. 81-101.
- [57] Wiyono, S.N., Deliana, Y., Wulandari, E., Kamarulzaman, N.H. The Embodiment of Muslim Intention Elements in Buying Halal Food Products: A Literature Review. (2022) *Sustainability (Switzerland)*, 14 (20), 13163.
- [58] Anggarkasih, M.G., Resma, P.S. The Importance of Halal Certification for the Processed Food by SMEs to Increase Export Opportunities. (2022) *E3S Web of Conferences*, 348, 00039.
- [59] Bux, C., Varese, E., Amicarelli, V., Lombardi, M. Halal Food Sustainability between Certification and Blockchain: A Review. (2022) *Sustainability (Switzerland)*, 14 (4), 2152.
- [60] Kua, J.M., Azizi, M.M.F., Abdul Talib, M.A., Lau, H.Y. Adoption of analytical technologies for verification of authenticity of halal foods—a review. (2022) *Food Additives and Contaminants - Part A*, 39 (12), 1906-1932.
- [61] Rakhmawati, N.A., Utomo, G.K., Indraswari, R., Susetyo, I.R. Halal Food Prediction Using the Similarity Graph Algorithms. (2022) *International Journal on Food System Dynamics*, 13 (2), 165-173.
- [62] Latifah, S., Purwoko, A., Fachrudin, K.A., Siregar, J.W. Identification non-timber forest products as a source of halal food for village communities around the forest. (2021) *E3S Web of Conferences*, 332, 04001.
- [63] Khaliqi, M., Pane, T.C. Young consumer awareness of halal food in Indonesia. (2021) *E3S Web of Conferences*, 332, 04004.
- [64] Prayudanti, A.A., Sucipto, S. Halal and safety traceability of material, production, and serving of local food in Surabaya: A review. (2021) *IOP Conference Series: Earth and Environmental Science*, 924 (1), 012002.

- [65] Kusnadi, J., Mahardita, P., Al-Awwaly, K.U., Arumingtyas, E.L. Novel primer targeting the mitochondrial NADH dehydrogenase subunit 4 (ND4) and NADH dehydrogenase subunit 5 (ND5) for detection of porcine (*Sus scrofa*) DNA fragments in food products for halal authentication. (2021) IOP Conference Series: Earth and Environmental Science, 924 (1), 012004.
- [66] Hernawan, A., Sunarwidhi, A.L., Prasedya, E.S., Widyastuti, S. A generalization SPARQL federated query: An initial step towards machine-readable web of data for halal food products. (2021) IOP Conference Series: Earth and Environmental Science, 913 (1), 012040.
- [67] de Castro, M.M., Mariano, R., Nuñez, C.L., Legaspi, A.P. Philippine halal food export industry: life cycle, trends, and global outlook. (2021) E3S Web of Conferences, 316, 02044.
- [68] Secinaro, S., Radwan, M., Calandra, D., Biancone, P. Halal certification impact on firms' corporate social responsibility disclosure: Evidence from the food & beverage sector in Italy. (2021) Corporate Social Responsibility and Environmental Management, 28 (4), 1376-1385.
- [69] Ruzulan, Z., Jamaludin, M.A., Ishak, A.H. Meat and meat-based products: Challenges and opportunities in halal food security. (2021) IOP Conference Series: Earth and Environmental Science, 756 (1), 012017.
- [70] Nursalwani, M., Suhada, R.N.N., Sannasi, A.P., Amizi, A.M., Ariff, A.L.Z. The involvement of young entrepreneurs in halal food products in Kelantan. (2021) IOP Conference Series: Earth and Environmental Science, 756 (1), 012001.
- [71] Nuraini, S., Sucipto. Comparison halal food regulation and practices to support halal tourism in Asia: A review. (2021) IOP Conference Series: Earth and Environmental Science, 733 (1), 012044.
- [72] Puspaningtyas, S.D., Sucipto, S. Integration of Halal Assurance System (HAS) in the Integrated Management System (IMS) to support food industry performance: A review. (2021) IOP Conference Series: Earth and Environmental Science, 733 (1), 012045.
- [73] Kamal, M.A., Effendi, F.D., Utomo, M.R., Sucipto, S., Santoso, I., Effendi, U. Bill of material analysis framework of food menu to increase raw material inventory efficiency and halal food inspection of culinary business. (2021) IOP Conference Series: Earth and Environmental Science, 733 (1), 012043.
- [74] Arifin, A., Wyman, F., Shintawati, Hendijani, R.B. An investigation of the aspects affecting non-Muslim customers' purchase intention of halal food products in Jakarta, Indonesia. (2021) Future of Food: Journal on Food, Agriculture and Society, 9 (2), 1-13.
- [75] Han, H., Lho, L.H., Raposo, A., Radic, A., Ngah, A.H. Halal food performance and its influence on patron retention process at tourism destination. (2021) International Journal of Environmental Research and Public Health, 18 (6), 3034, 1-15.
- [76] Sukmanadi, M., Wahjuni, R.S. Characterization of aflatoxin b1 biomarkers as preference for antitoxin candidates for biosensors for halal food supply. (2020) Indian Journal of Forensic Medicine and Toxicology, 14 (4), 3162-3167.
- [77] Madenci, A.B., Bayramoglu, Z., Türker, S., Agizan, K., Eyliz, V. Determination of Consumer's Willingness to Pay for Halal Food. (2020) Journal of Tekirdag Agricultural Faculty, 17 (3), 346-356.
- [78] Addina, F.N., Santoso, I., Sucipto. Concept of halal food development to support halal tourism: A review. (2020) IOP Conference Series: Earth and Environmental Science, 475 (1), 012053.
- [79] Desriani, Sugiana, F.A., Widayati, H., Suryani, Sukma, A., Wulandari, D., Warisman, M.A. Triplex PCR for halal authentication of processed food: Development and Characterization. (2020) IOP Conference Series: Earth and Environmental Science, 439 (1), 012047.
- [80] Thamagasorn, M., Pharino, C. An analysis of food waste from a flight catering business for sustainable food waste management: A case study of halal food production process. (2019) Journal of Cleaner Production, 228, 845-855.
- [81] Jaswir, I., Mirghani, M.E.S., Almansori, B.H., Octavianti, F. Halal food security: Forensic and laboratory management. (2019) Societal Dimensions of Environmental Science: Global Case Studies of Collaboration and Transformation, 117-128.
- [82] Wiryani, F., Najih, M., Haris, A. An analysis of legal protection of halal and thoyib food consumers in court judgments. (2018) IOP Conference Series: Earth and Environmental Science, 175 (1), 012195.
- [83] Noh, R.M., Won-Jin, L., Jae-Dong, L. Design O2O recommendation system for halal food product (HFP) using rule-based user activities. (2017) Advanced Science Letters, 23 (10), 9491-9495.
- [84] Fuseini, A. Halal food Certification in the UK and its impact on food businesses: A review in the context of the European Union. (2017) CAB Reviews: Perspectives in Agriculture, Veterinary Science, Nutrition and Natural Resources, 12, 007.
- [85] Ibrahem, H., Mustapha, N., Kamaruddin, R., Hamid, N.A., Samah, M.A.A. Halal compliance decisions by food suppliers based on analytic hierarchy process. (2016) Advanced Science Letters, 22 (12), 4509-4513.
- [86] Mahamod, L.H., Yahya, W.N.A.W., Shamsuddin, W.N.W., Othman, R., Hashim, K.S.H.-Y., Ibrahim, M. Islamic tourism: Beyond than just halal food and a place for prayer. (2015) Advanced Science Letters, 21 (6), 2085-2088.
- [87] Manzouri, M., Ab-Rahman, M.-N., Zain, C.R.C.M., Jamsari, E.A. Increasing production and eliminating waste through lean tools and techniques for Halal food companies. (2014) Sustainability (Switzerland), 6 (12), 9179-9204.
- [88] Rahman, M.N.A., Manzouri, M., Che Mohd Zain, C.R. Environmental concern in managing halal food supply chain. (2013) American Journal of Environmental Sciences, 9 (3), 43-55.
- [89] Kurokawa, K. Challenge of the Halal food certificate for food marketing: Implications from the local branding strategy of Thailand. (2011) Studies in Regional Science, 41 (4), 1045-1054.
- [90] Komala, O.N., Ellisa, E., Andri Yatmo, Y. The characteristics of halal and non-halal food territories in multilayered mapping of Jakarta's Chinatown urban foodscape. (2022) A/Z ITU Journal of the Faculty of Architecture, 19 (1), pp. 119-135.
- [91] Yousaf, S. Halal food anxiety in a non-Muslim destination: the impact on the psychological well-being of Muslim travelers during the quarantine period in China. (2022) Current Issues in Tourism, 25 (7), pp. 1136-1150.
- [92] Lucking, M. "Food unites us... not anymore!?" Indonesian pilgrims eating kosher and halal in Jerusalem. (2022) Food, Culture and Society, 25 (4), pp. 699-711.
- [93] de Araujo, S.H., Hamid, S.C., do Rego, A.G. Urban food environments and cultural adequacy: the (dis)assemblage of urban halal food environments in Muslim minority contexts. (2022) Food, Culture and Society, 25 (5), pp. 899-916.
- [94] Mostafa, M.M. Mining halal food search pathways down the Wikipedia's rabbit hole. (2022) Food, Culture and Society, 25 (1), pp. 49-69.
- [95] Oh, J., Kim, M.K. Effect of alternative preservatives on the quality of rice cakes as halal food. (2021) Foods, 10 (10), art. no. 2291.
- [96] Azizah, S.N. Online Traceability of Halal Food Information to Protect Muslim Consumers in the Cyber Era. (2021) International Journal of Cyber Criminology, 15 (2), pp. 1-17.

- [97] Shahkat Ali, M.S., Ahamat, A., Yas, R.B. Exploring social media marketing strategies in small and medium enterprises (SMEs) of the halal food industry. (2021) *SEARCH Journal of Media and Communication Research*, 2021 (Special Issue), pp. 157-168.
- [98] Araujo, S.H.D. Desired Muslims: Neoliberalism, halal food production and the assemblage of Muslim expertise, service providers and labour in New Zealand and Brazil. (2021) *Ethnicities*, 21 (3), pp. 411-432.
- [99] Nur Yasar, H. Stereotyping Halal Food and Eating Halal Food in a South Korean Context. (2021) *European Journal of Korean Studies*, 21 (1), pp. 259-290.
- [100] Azizah, S.N. A Theoretical thought of Legal Regulation of Halal Food. (2021) *International Journal of Criminal Justice Sciences*, 16 (2), pp. 220-235.
- [101] Yazawa, A., Kikuoka, T. Knowledge of halal Foods by University Students Enrolled in a Dietitian Training Course in Japan. (2021) *Journal of Hospitality and Tourism Education*, doi=10.1080%2f10963758.2021.1963741&partnerID=40&md5=284b3c50918d7d8bc30219fd7b0fbc65
- [102] Perguna, L.A., Irawan, L.Y., Kurniawati, E., Triharini, S., Pahlevi, D.S., Febrianto, A.D. Halal for all: Geo spatial tourism of halal food stalls in Muslim minority tourist destinations. (2021) *Geojournal of Tourism and Geosites*, 36 (2 spl), pp. 715-720.
- [103] Roodbar, S., Veeck, G. Spatial and temporal changes in Halal food sales and consumption. A case study of the city of Dearborn, Michigan. (2021) *Journal of Cultural Geography*, 38 (2), pp. 235-261.
- [104] Pradana, M., Huertas-García, R., Marimon, F. Muslim tourists' purchase intention of halal food in Spain. (2021) *Current Issues in Tourism*, 24 (13), pp. 1814-1818.
- [105] Isakjee, A., Carroll, B. Blood, body and belonging: the geographies of halal food consumption in the UK. (2021) *Social and Cultural Geography*, 22 (4), pp. 581-602.
- [106] Mannaa, M.T. Halal food in the tourist destination and its importance for Muslim travellers. (2020) *Current Issues in Tourism*, 23 (17), pp. 2195-2206.
- [107] Bhoola, S. Halal food tourism: Perceptions of relevance and viability for South African destinations. (2020) *African Journal of Hospitality, Tourism and Leisure*, 9 (3), pp. 288-301.
- [108] Othman, R., Ramya, R., Azeman, M.A., Hassan, N.M., Kamoona, S. Extraction, and characterization of carotenoids from 11 allelopathic plant species as potential halal food colorants and active pharmaceutical ingredients. (2020) *Journal of Pharmacy and Nutrition Sciences*, 10 (1), pp. 19-24.
- [109] Mostafa, M.M. Global halal food discourse on social media: a text mining approach (2020) *Journal of International Communication*, 26 (2), pp. 211-237.
- [110] Stier, J., Sandstrom, M. Managing the symbolic power of halal meat in Swedish preschools: Food for thought in discussions on diversity. (2020) *Journal of Intercultural Communication*, 2020 (52), pp. 92-106.
- [111] Ustadi, M.N., Osman, S., Rasi, R.Z. Perception of non-muslim manufacturers towards halal food supply chain in Malaysia. (2020) *International Journal of Innovation, Creativity and Change*, 10 (11), pp. 430-440.
- [112] Ariffin, A., Fadzilullah, W.N.F.W.M. The Promotional Language of the Halal Food Industry: Some Preliminary Findings. (2019) *Global Journal Al-Thaqafah*, pp. 103-113.
- [113] Fewkes, J.H. "Siri is alligator halal?": Mobile apps, food practices, and religious authority among American Muslims. (2019) *Anthropological Perspectives on the Religious Uses of Mobile Apps*, pp. 107-129.
- [114] Kwag, S.I., Ko, Y.D. Optimal design for the Halal food logistics network. (2019) *Transportation Research Part E: Logistics and Transportation Review*, 128, pp. 212-228.
- [115] Jaswir, I., Mirghani, M.E.S., Almansori, B.H., Octavianti, F. Halal food security: Forensic and laboratory management. (2019) *Societal Dimensions of Environmental Science: Global Case Studies of Collaboration and Transformation*, pp. 117-128.
- [116] Masrom, N.R., Daut, B.A.T., Raja Mohd Rasi, R.Z., Niraula, B. Evaluation of the business excellent implementation among halal certified food manufacturers in Malaysia. (2019) *Humanities and Social Sciences Reviews*, 7 (2), pp. 220-225.
- [117] Widyantoro, S., Arsyad, R., Fathoni, M. Halal food industry in Southeast Asia's Muslim majority countries: A reference for non-Muslim countries. (2019) *Intellectual Discourse*, 27, pp. 767-781.
- [118] Yama, A., Jermisittiparsert, K., Saregar, A. Impact of halal food certification on restaurant business in Indonesia: The mediating role of ethical compliance. (2019) *International Journal of Innovation, Creativity and Change*, 9 (7), pp. 306-322.
- [119] Ratnasari, R.T., Gunawan, S., Possumah, B.T., Rusmita, S.A., Widiastuti, T., Herianingrum, S. Halal food certification for improving the competitiveness of small and medium enterprises (2019) *Opcion*, 35 (Special Issue 22), pp. 510-525.
- [120] Sulaiman, M.Z.M., Noordin, N., Md Noor, N.L., Suhaimi, A.I.H., Isa, W.A.R.W.M. Halal virtual inspection requirements for food premise inspection process towards the virtualization of Malaysia Halal certification system. (2018) *Proceedings - International Conference on Information and Communication Technology for the Muslim World 2018, ICT4M 2018*, art. no. 8567088, pp. 12-17.
- [121] Erie, M.S. Shariae As Taboo of Modern Law: Halal Food, Islamophobia, and China. (2018) *Journal of Law and Religion*, 33 (3), pp. 390-420.
- [122] Halawa, A. Acculturation of halal food to the American food culture through immigration and globalization: A literature review. (2018) *Journal of Ethnic and Cultural Studies*, 5 (2), pp. 53-63.
- [123] Suratty, D.H. Managing demand growth for halal food. (2018) *Fulfilling The Trust: 50 Years Of Shaping Muslim Religious Life In Singapore*, pp. 199-219.
- [124] Garcia, A.L. Controversial aspects of religious freedom in Spain and Europe: Halal food and casher. (2017) *Estudios Constitucionales*, 15 (2), pp. 331-364.
- [125] Hussein, S. Halal chops and fascist cupcakes: On diversity and the weaponisation of food. (2017) *Meanjin*, 76 (1), pp. 124-129.
- [126] Ono, J. Halal foods discourse and constructing Muslim identities in Japan. (2017) *Feeding Japan: The Cultural and Political Issues of Dependency and Risk*, pp. 313-337.
- [127] Khosravi, M., Karbasi, M., Shah, A., Brohi, I.A., Ali, N.I. An adoption of halal food recognition system using mobile Radio Frequency Identification (RFID) and Near Field Communication (NFC). (2017) *Proceedings - 6th International Conference on Information and Communication Technology for the Muslim World, ICT4M 2016*, art. no. 7814879, pp. 70-75.
- [128] Lopes, A.B. Legal conditions and controls for halal food Experience Indonesia. (2017) *Ahkam: Jurnal Ilmu Syariah*, 17 (1), pp. 241-258.

- [129] Ismail, C.T., Rahman, A.A., Abdullah, N.A. Halal food regulations in Malaysia: Concept and compliance. (2017) *Man in India*, 97 (24), pp. 291-300.
- [130] Yusoff, S.Z., Mohamad, N., Ghazali, M.F., Abdullah, N.H., Syed Azmy, S.N.M. The usage of social media as an information seeking tool of Halal food products. (2016) *International Journal of Applied Linguistics and English Literature*, 5 (6), pp. 245-248.
- [131] Ali, M. The Concept of Halal Food in Sharia Perspective and Product Responsibility of Halal Industry. (2016) *Ahkam: Jurnal Ilmu Syariah*, 16 (2), pp. 291-306.
- [132] Wataru, N. An attempt to apply actor-network theory to halal food production and supply in Japan. (2016) *Japanese Journal of Human Geography*, 68 (4), pp. 421-441.
- [133] Mohd Noor, M.A., Rizki Moi, M., Abdul Kader, R. The efficiency of halal processed food industry in Malaysia. (2016) *Global Journal Al-Thaqafah*, 6 (1), pp. 37-46.
- [134] Sai, Y., Fischer, J. Muslim food consumption in China: Between qingzhen and halal. (2015) *Halal Matters: Islam, Politics and Markets in Global Perspective*, pp. 160-174.
- [135] Bergeaud-Blackler, F. Who owns halal?: Five international initiatives of halal food regulations. (2015) *Halal Matters: Islam, Politics and Markets in Global Perspective*, pp. 192-197.
- [136] Arif, S., Sidek, S. Application of halalan tayyiban in the standard reference for determining Malaysian halal food. (2015) *Asian Social Science*, 11 (17), pp. 116-129.
- [137] Mahamod, L.H., Yahya, W.N.A.W., Shamsuddin, W.N.W., Othman, R., Hashim, K.S.H.-Y., Ibrahim, M. Islamic tourism: Beyond than just halal food and a place for prayer. (2015) *Advanced Science Letters*, 21 (6), pp. 2085-2088.
- [138] Rejab, N.H., Ruhadi, N.R.A.N., Arsat, A., Jamil, J., Hassan, H. Customer perceptions on Halal food quality towards their revisit intention: A case study on Chinese Muslim restaurants. (2015) *Theory and Practice in Hospitality and Tourism Research - Proceedings of the 2nd International Hospitality and Tourism Conference 2014*, pp. 381-384.
- [139] Pointing, J. Strict Liability Food Law and Halal Slaughter. (2014) *Journal of Criminal Law*, 78 (5), pp. 387-391.
- [140] Karrebak, M.S. Rye bread and halal: Enregisterment of food practices in the primary classroom. (2014) *Language and Communication*, 34 (1), pp. 17-34.
- [141] Wright, W., Annes, A. Halal on the menu?: Contested food politics and French identity in fast-food. (2013) *Journal of Rural Studies*, 32, pp. 388-399.
- [142] Ambali, A.R., Bakar, A.N. Halāl food and products in Malaysia: People's awareness and policy implications. (2013) *Intellectual Discourse*, 21 (1), pp. 7-32.
- [143] Ali, M.E., Kashif, M., Uddin, K., Hashim, U., Mustafa, S., Che Man, Y.B. Species Authentication Methods in Foods and Feeds: The Present, Past, and Future of Halal Forensics. (2012) *Food Analytical Methods*, 5 (5), pp. 935-955.
- [144] Adams, I.A. Globalization: Explaining the dynamics and challenges of the halāl food surge. (2011) *Intellectual Discourse*, 19 (1), pp. 123-145.
- [145] Bon, M., Hussain, M. Halal food and tourism: Prospects and challenges. (2010) *Bridging Tourism Theory and Practice*, 2, pp. 47-59.
- [146] Pointing, J., Teinaz, Y., Shafi, S. Illegal Labelling and Sales of Halal Meat and Food Products. (2008) *Journal of Criminal Law*, 72 (3), pp. 206-213.
- [147] Othman, R., Mohamad Zailani, S.H., Ahmad, Z.A. Production of halal food: Practices of muslim small enterprises in Malaysia. (2008) *International Journal of Interdisciplinary Social Sciences*, 3 (9), pp. 69-76.
- [148] James, R. Introduction Halal pizza: Food and culture in a busy world. (2004) *Australian Journal of Anthropology*, 15 (1), pp. 1-11.
